# Supplementary material for: Spontaneous formation of hierarchical structures in some polylactide/polysilsesquioxane blends
Source: Royal Society of Chemistry journal article supplement (doi:10.1039/d2ce00900e), 2022-01-01
Supplement: d2ce00900e1.pdf [file d2ce00900e1.pdf]

## Spontaneous formation of hierarchical structures in some polylactide/polysilsesquioxane blends.

Supporting Information

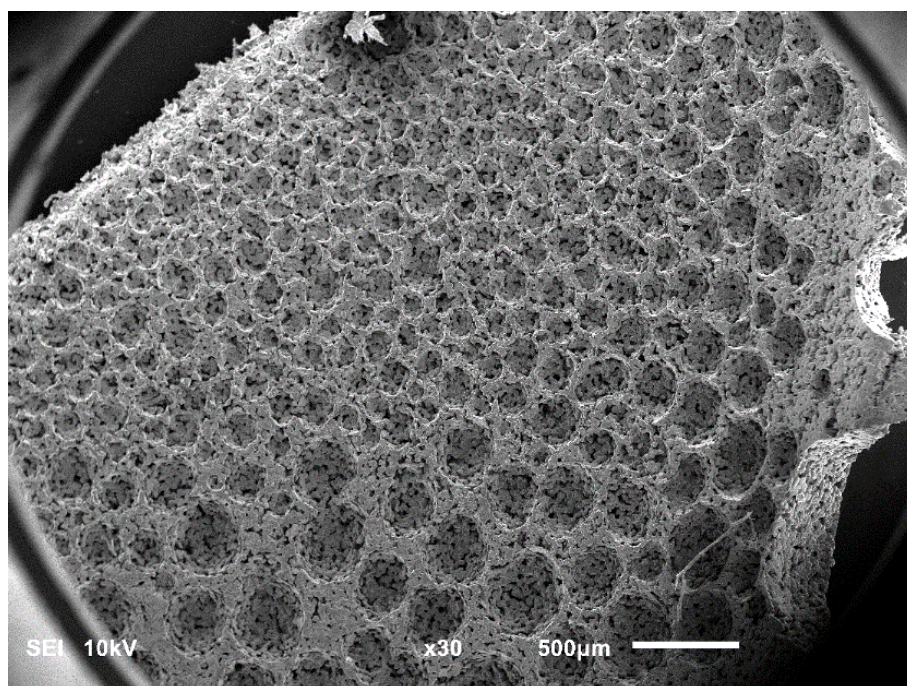

**Figure S1.** SEM micrograph of P/100-OH.

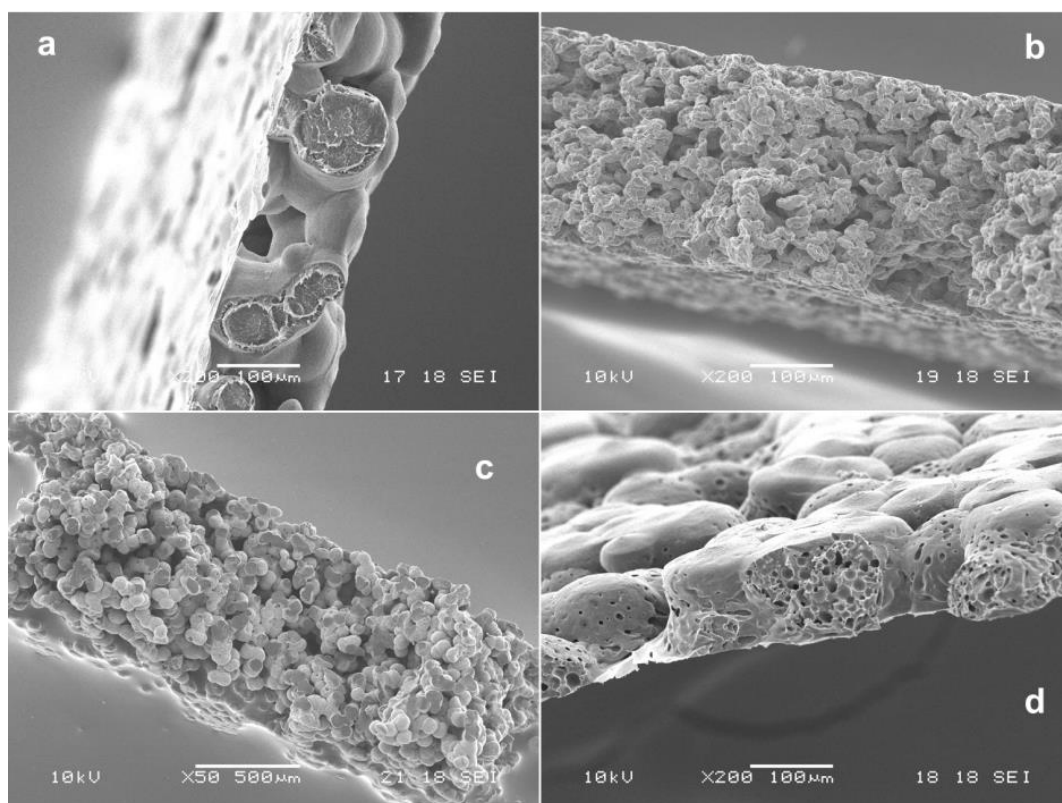

**Figure S2.** Freeze-fractured cross-sections of PLA (a), P/100-OH (b), P/100-COOH (c) and P/100-COOMe (d).

(a)

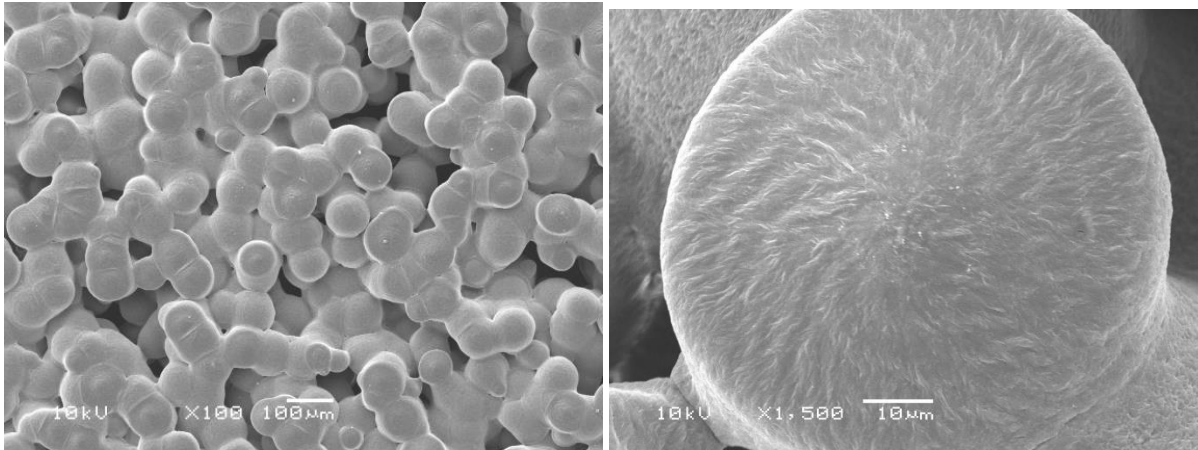

(b)

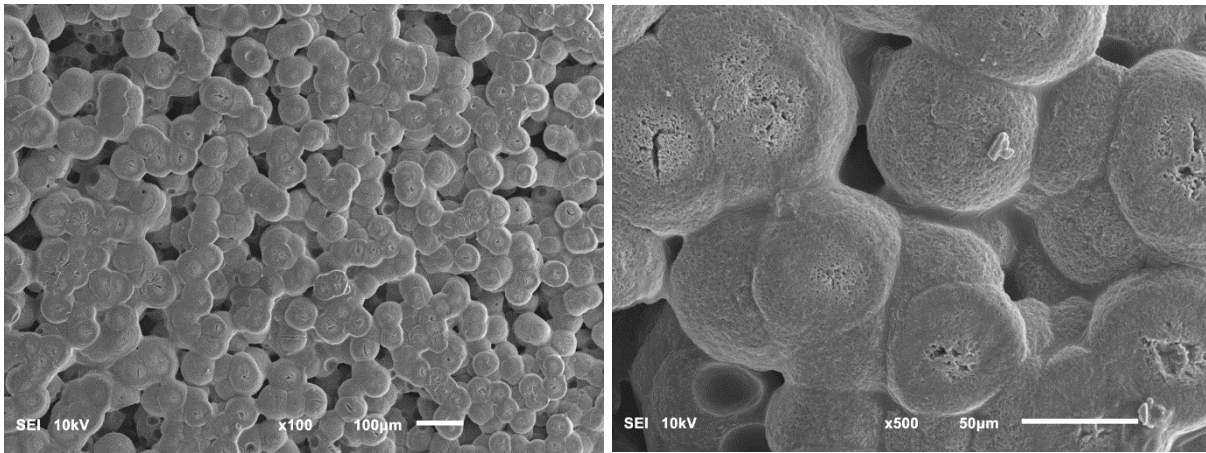

(c)

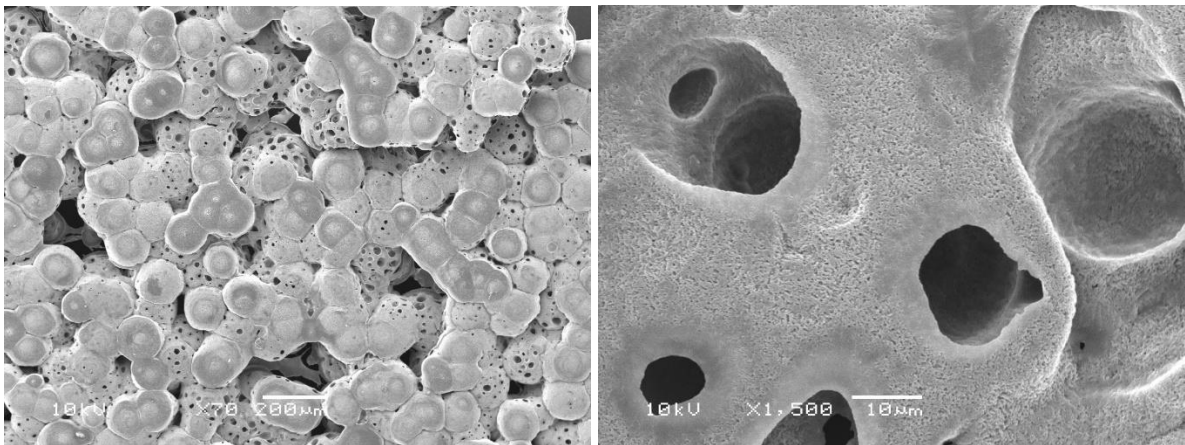

**Figure S3.** SEM micrographs of free surfaces of samples etched with MeOH (a) PLA THF; (b) P/100-COOH; (c) P/100-COOME.

**Table S1.** Characteristic IR vibration modes ( $\text{cm}^{-1}$ ) and Raman shifts ( $\text{cm}^{-1}$ ) in PLA and LPSQ-R.

| sample     | spectroscopy | Characteristic modes                                                                                                                                                                                                                                                                                                                                                                                                                                                                                                  |
|------------|--------------|-----------------------------------------------------------------------------------------------------------------------------------------------------------------------------------------------------------------------------------------------------------------------------------------------------------------------------------------------------------------------------------------------------------------------------------------------------------------------------------------------------------------------|
| LPSQ-OH    | IR           | $\nu(\text{O-H})$ 3300; $\nu(\text{C-H})$ 2950-2850; $\delta_{\beta}(\text{COH})$ 1410; $\delta_{\text{as}}(\text{CH}_2)$ 1409; $\nu(\text{C-O})$ 1277; $\delta_{\text{s}}(\text{Si-CH}_3)$ 1254; $\delta(\text{Si-CH}_2)$ 1180; $\nu_{\text{as}}(\text{Si-O})$ 1123; $\nu_{\text{s}}(\text{Si-O})$ 1065, 1026; $\nu(\text{O-H})$ 944; $\nu(\text{Si-C})$ 758                                                                                                                                                         |
|            | Raman        | $\delta(\text{COH})$ 1465; $\delta_{\text{as}}(\text{CH}_2)$ 1413; $\rho(\text{CH}_2)$ 1177; $\nu(\text{CCO})$ in $1^\circ$ alcohols 1003; $\nu(\text{CCO})$ in $1^\circ$ alcohols 944; $\nu(\text{C-S})$ 763, 715, 659                                                                                                                                                                                                                                                                                               |
| LPSQ-COOH  | IR           | $\nu(\text{O-H})$ 3300; $\nu(\text{C-H})$ 2900-2650; $\nu(\text{C=O})$ 1700; $\delta_{\beta}(\text{COH})$ 1414; $\delta_{\text{as}}(\text{CH}_2)$ 1409; $\nu(\text{C-O})$ 1282; $\delta_{\text{s}}(\text{Si-CH}_2)$ 1253; $\delta(\text{Si-CH}_2)$ 1181; $\nu_{\text{as}}(\text{Si-O})$ 1123; $\nu_{\text{s}}(\text{Si-O})$ 1095, 1040; $\nu(\text{O-H})$ 842; $\nu(\text{Si-C})$ 780                                                                                                                                 |
|            | Raman        | $\nu(\text{C=O})$ 1700; $\delta(\text{COH})$ 1440; $\delta_{\text{as}}(\text{CH}_2)$ 1406; $\rho(\text{CH}_2)$ 1180; $\nu(\text{C-COO})$ 891; $\nu(\text{C-S})$ 789; 712; 672                                                                                                                                                                                                                                                                                                                                         |
| LPSQ-COOMe | IR           | $\nu(\text{C-H})$ 2950-2900; $\nu(\text{C=O})$ 1734; $\delta_{\text{as}}(\text{CH}_2)$ 1436; $\nu(\text{C-O})$ 1283; $\delta_{\text{s}}(\text{Si-CH}_2)$ 1254; $\delta(\text{Si-CH}_2)$ 1182; $\nu_{\text{as}}(\text{Si-O})$ 1127; $\nu_{\text{s}}(\text{Si-O})$ 1046; $\nu(\text{Si-C})$ 800                                                                                                                                                                                                                         |
|            | Raman        | $\nu(\text{C=O})$ 1731; $\delta_{\text{as}}(\text{CH}_2)$ 1411; $\rho(\text{CH}_2)$ 1182; $\nu(\text{C-COO})$ 876; $\nu(\text{C-COO})$ 902; $\nu(\text{C-S})$ 789, 709                                                                                                                                                                                                                                                                                                                                                |
| PLA        | IR           | $\nu(\text{C=O})$ 1760; $\delta_2\text{CH}$ 1304; $\nu_{\text{as}}(\text{COC})+\delta(\text{CH})$ 1270; $\nu_{\text{as}}(\text{COC})+\rho_{\text{as}}(\text{CH}_3)$ 1213, 1183, 1222 (cryst.), 1202 (cryst.); $\rho_{\text{s}}(\text{CH}_3)$ 1132, 1144 (cryst.); $\nu_{\text{s}}(\text{COC})$ 1081, 1093 (cryst.); $\nu(\text{C-CH}_3)$ 1042, 1023; $\rho(\text{CH}_3)+\nu(\text{C-COO})$ amorphous 955; $\rho(\text{CH}_3)+\nu(\text{C-COO})$ (cryst.) 920-922; $\nu(\text{C-COO})$ 864; $\delta\text{C=O}$ 740-760 |
|            | Raman        | $\nu(\text{C=O})$ 1767; $\delta_{\text{as}}\text{CH}_3$ 1452; $\delta_{\text{s}}\text{CH}_3$ 1384; $\delta_1\text{CH} + \delta_{\text{s}}\text{CH}_3$ 1349; $\delta_2\text{CH}$ 1298; $\delta(\text{CH}) + \nu(\text{COC})$ 1220; $\nu_{\text{as}}(\text{COC}) + r_{\text{as}}\text{CH}_3$ 1180; $r_{\text{as}}\text{CH}_3$ 1126; $\nu_{\text{s}}(\text{COC})$ 1090; $r(\text{C-CH}_3)$ 1042; $r\text{CH}_3 + \nu\text{CC}$ 950; $\nu(\text{C-COO})$ 873                                                              |

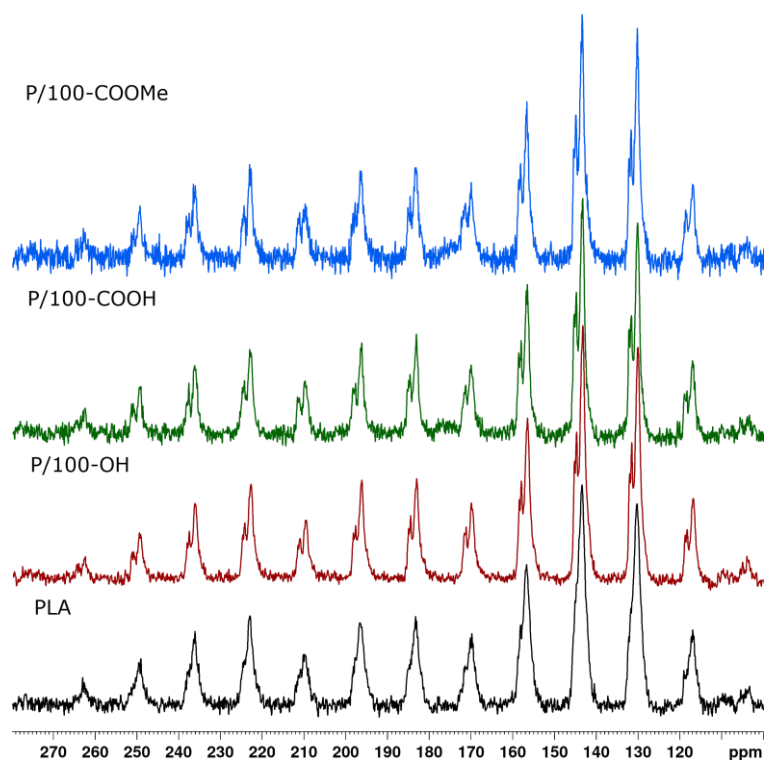

**Figure S4.** The shape of the  $^{13}\text{C}$  chemical shielding tensors of carbonyl groups originating from pure PLA and P/100-R samples.



**Table S2.** Theoretical values of the isotropic and anisotropic  $^{13}\text{C}$  shieldings arising from carbonyl group of a fragment of PLA molecule not interacting with any other molecules, as well as of the same fragment interacting via formation of  $\text{C}=\text{O}\cdots\text{H}-\text{O}$  hydrogen bond with fragments of LPSQ-OH and LPSQ-COOH.

| PLA                                                                                                                     |                                                                                                                         |
|-------------------------------------------------------------------------------------------------------------------------|-------------------------------------------------------------------------------------------------------------------------|
| 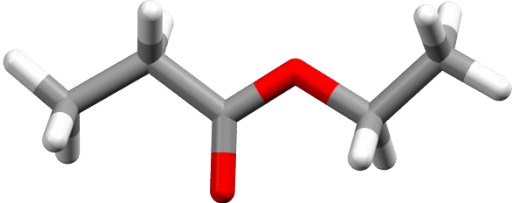                                       | $\sigma_{\text{iso}} = 2.8$<br>$\sigma_{11} = -95.4$<br>$\sigma_{22} = 38.2$<br>$\sigma_{33} = 65.6$                    |
| P/100-OH                                                                                                                | P/100-COOH                                                                                                              |
|                                       |                                       |
| $\sigma_{\text{iso}} = \mathbf{-1.0}$<br>$\sigma_{11} = -93.4$<br>$\sigma_{22} = \mathbf{20.1}$<br>$\sigma_{33} = 70.3$ | $\sigma_{\text{iso}} = \mathbf{-2.6}$<br>$\sigma_{11} = -89.4$<br>$\sigma_{22} = \mathbf{10.2}$<br>$\sigma_{33} = 71.3$ |

**Table S3.** SCF energy and Gibbs free energy differences (in kJ/mol) between three conformations of 10-units chains of PLLA and PLLA+D.

| starting conformation | SCF   |        | $\Delta\text{G}$ |        |
|-----------------------|-------|--------|------------------|--------|
|                       | PLLA  | PLLA+D | PLLA             | PLLA+D |
| <i>gt</i>             | 0.00  | 0.00   | 0.00             | 0.00   |
| <i>gg</i>             | 36.91 | 40.77  | 39.35            | 42.79  |
| <i>tg</i>             | 84.73 | 44.00  | 88.40            | 56.66  |
